# Supplementary material
Source: PubMed Central journal article supplement (PMC4675860)
Supplement: mmc1.pdf [file mmc1.pdf]

**Biophysical Journal**

**Supporting Material**

**Pneumocytes Assemble Lung Surfactant as Highly Packed/Dehydrated States with Optimal Surface Activity**

Alejandro Cerrada,<sup>1</sup> Thomas Haller,<sup>2</sup> Antonio Cruz,<sup>1</sup> and Jesús Pérez-Gil<sup>1,\*</sup>

<sup>1</sup>Department of Biochemistry, Faculty of Biology, and Hospital 12 Octubre Research Institute, Universidad Complutense, Madrid, Spain; and <sup>2</sup>Department of Physiology and Medical Physics, Medical University of Innsbruck, Innsbruck, Austria

## Supporting Material

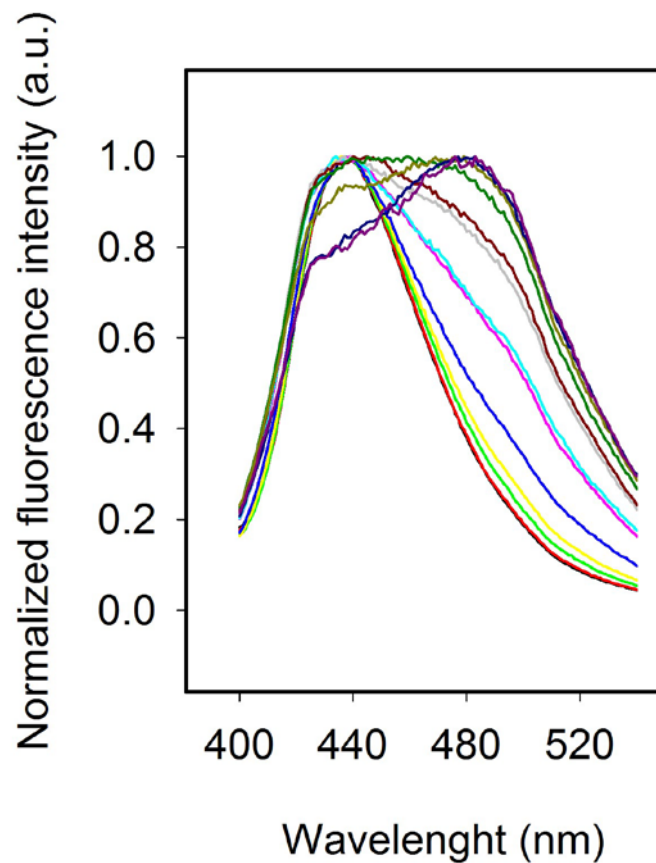

**Supplementary Figure S1. Thermotropic profile of membrane suspensions reconstituted from OE, the organic extract of native surfactant purified as measured by LAURDAN spectroscopy.** Fluorescence emission spectra of LAURDAN in suspensions of the surfactant organic extract (OE), recorded at 10 °C (—), 15 °C (—), 20 °C (—), 25 °C (—), 30 °C (—), 35 °C (—), 37 °C (—), 40 °C (—), 42 °C (—), 45 °C (—), 50 °C (—), 55 °C (—) and 60 °C (—).

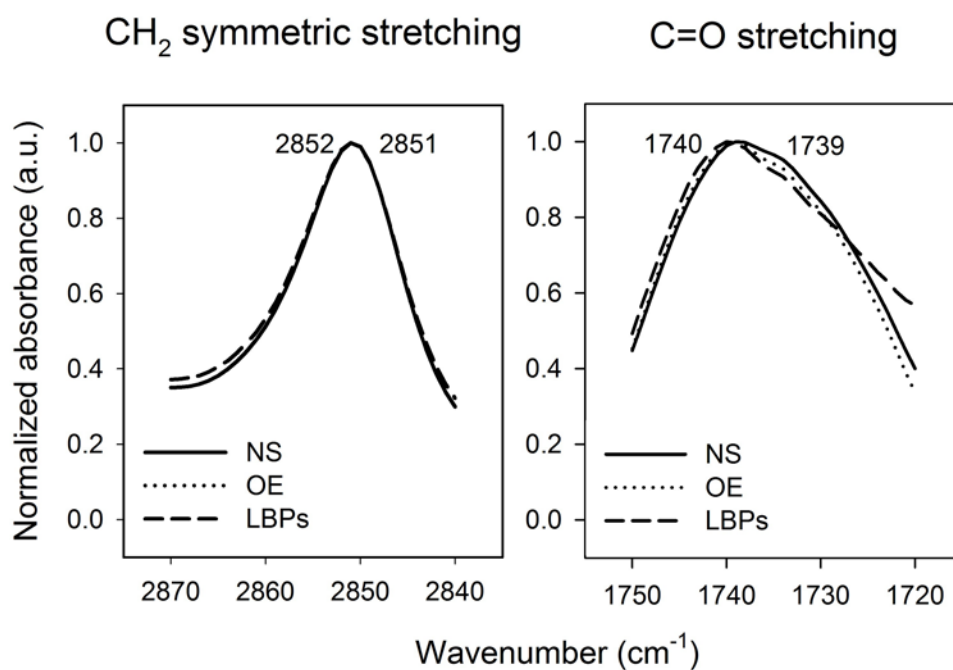

**Supplementary Figure S2.** ATR-FTIR spectra of NS (—), OE (·····) and LBPs (----) membranes at spectral regions sensitive to the CH<sub>2</sub> symmetric stretching band (left panel) and the C=O stretching band (right panel). Numbers indicate the wavenumber at the maximum of each peak to highlight the shift between the different surfactant materials. Data shown are means ± standard deviation from 3 independent experiments
